# Supplementary material for: Formation of topological defects at liquid/liquid crystal interfaces in micro-wells controlled by surfactants and light
Source: Royal Society of Chemistry journal article supplement (doi:10.1039/d3sm00838j), 2023-01-01
Supplement: d3sm00838j1.pdf [file d3sm00838j1.pdf]

## Supplementary Information

### **Formation of Topological Defects at Liquid / Liquid Crystal Interfaces in Micro-Wells Controlled by Surfactants and Light**

Kenji Katayama *et al.*

\*Corresponding author. Email:kkata@kc.chuo-u.ac.jp

#### **This files include:**

Figs. S1 to S4

Movies S1 to S3

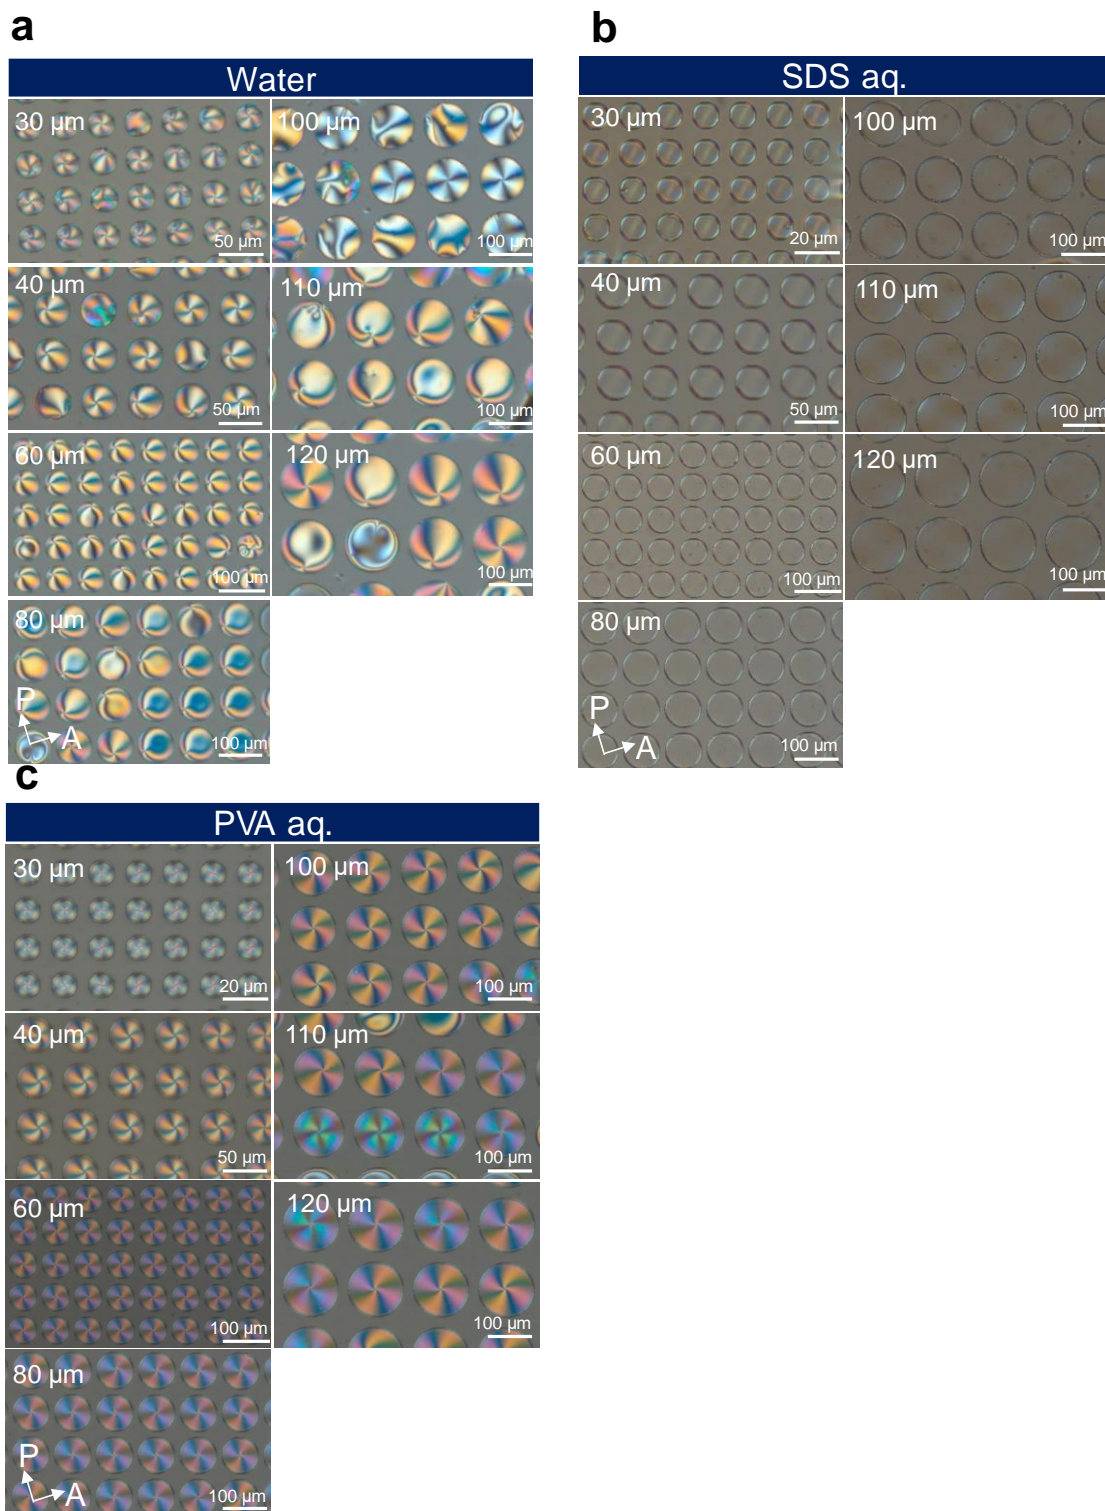

**Fig. S1.**

The POM images of liquid-5CB Interfaces in micro-well arrays with varied diameters for 5  $\mu\text{m}$  depth are shown. The polarizing optical microscope (POM) images for each liquid/5CB interface

for micro-wells whose diameters (**d**) were 30-120  $\mu\text{m}$ . The depths (**h**) of the micro-well were 5  $\mu\text{m}$ . Water, SDS and PVA solutions were used as the liquid phase for (a), (b), and (c), respectively.

**a**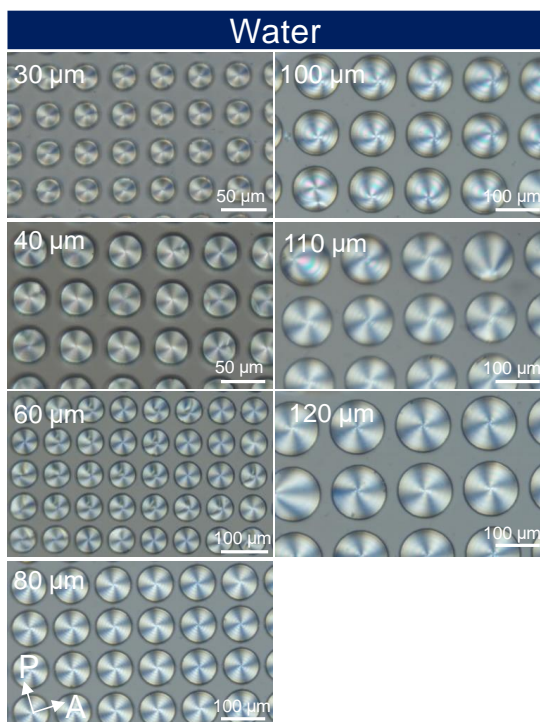**b**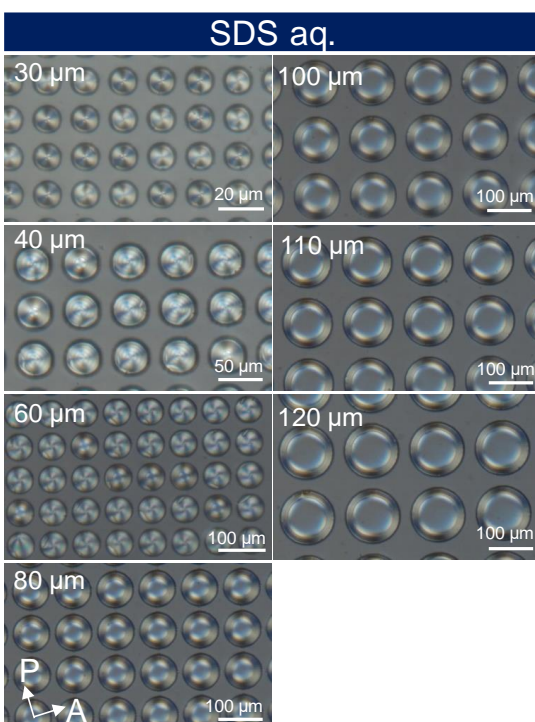**c**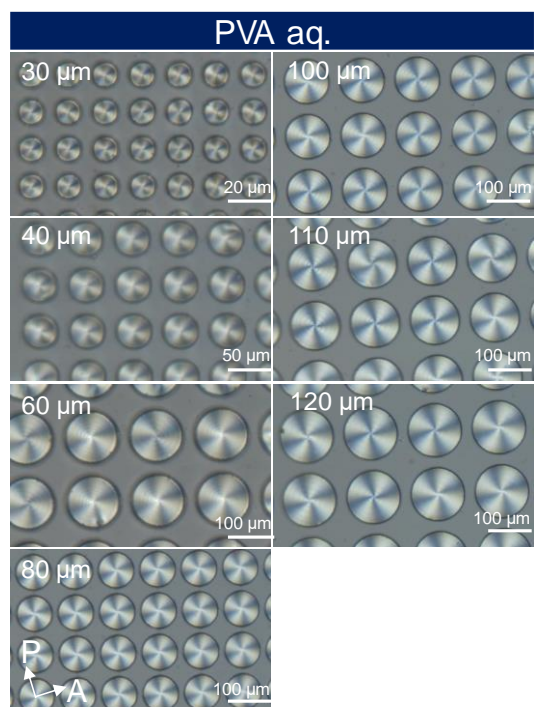**Fig. S2.**

The POM images of liquid-5CB Interfaces in micro-well arrays with varied diameters for 30  $\mu\text{m}$  depth are shown. The polarizing optical microscope (POM) images for each liquid/5CB interface for micro-wells whose diameters (**d**) were 30-120  $\mu\text{m}$ . The depths (**h**) of the micro-well were 30  $\mu\text{m}$ . Water, SDS and PVA solutions were used as the liquid phase for (a), (b), and (c), respectively.

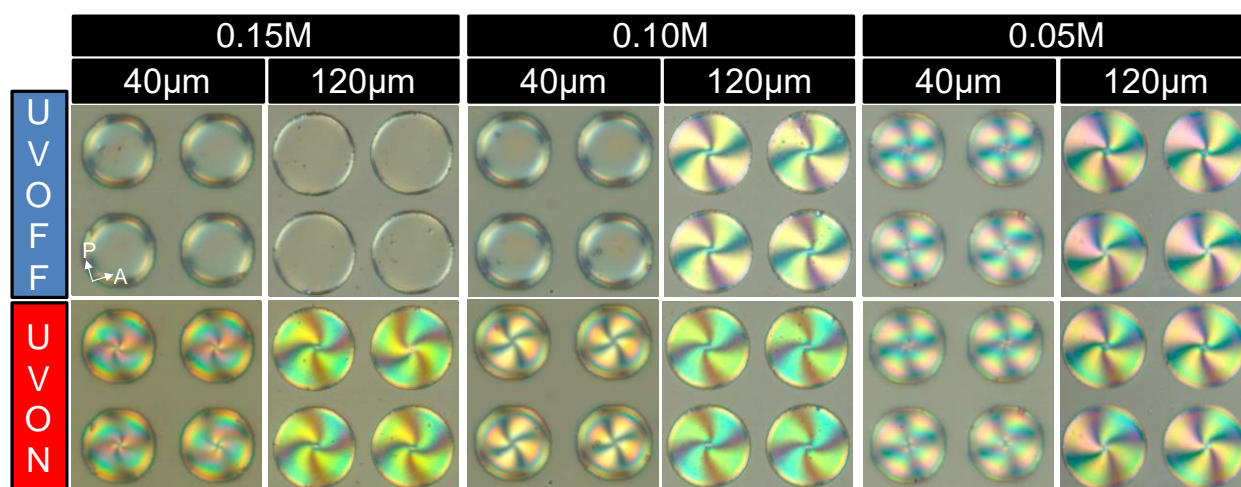

**Fig. S3.**

BHAB concentration dependence of photoresponse of POM images in micro-well arrays filled with 7CB covered with water is shown. The BHAB concentration dependence of the POM images of the micro-wells filled with 7CB covered with water before (top) and after (bottom) the UV light irradiation. The BHAB concentrations were 0.05, 0.10, 0.15 M, respectively. The micro-wells were 40 and 120  $\mu$ m in diameter (**d**) and 10  $\mu$ m in depth (**h**).

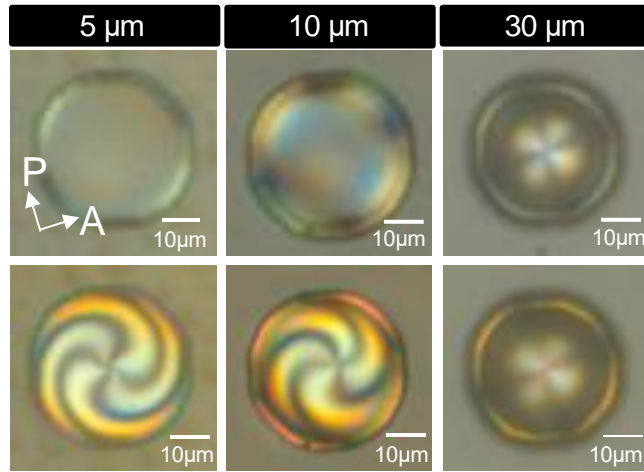

**Fig. S4.**

Micro-well depth dependence of photoresponse of POM images in micro-well arrays filled with 7CB covered with water is shown. The micro-well depth dependence of the POM images of the micro-wells filled with 7CB covered with water before (top) and after (bottom) the UV light irradiation. The depths (**h**) of micro-wells were 5, 10, and 30  $\mu\text{m}$ , respectively. The micro-wells were 30  $\mu\text{m}$  in diameter (**d**).

**Movie S1.**

A movie shows the sample injection process to the microfluidic device. First, an LC was injected using a micropipette, after that, aqueous surfactant solutions were introduced to make a liquid / LC interface.

**Movie S2.**

A movie for the photo-induced topological defect formation observed with POM. The sample was 7CB/water in micro-wells. The LC includes 0.1 M BHAB.

**Movie S3.**

A movie for the photo-induced topological defect formation observed with POM. The sample was 7CB/water in micro-wells. The LC includes 0.1 M PAP.
